# Supplementary material
Source: PubMed Central journal article supplement (PMC2048791)
Supplement: plntphys_pp.107.107300_3.pdf [file plntphys_pp.107.107300_3.pdf]

## SUPPLEMENTAL DATA

**Supplemental Figure 1. Cryo-scanning electron micrographs of inflorescence stem surfaces.** Epicuticular wax crystals are found in similar numbers and shapes on Col-0 wild type (**A** and **C**) and *mah-1* stems (**B** and **D**). Bars = 10  $\mu\text{m}$  for (**A**, **B**) and 2  $\mu\text{m}$  for (**C**, **D**).

**Supplemental Figure 2. Confirmation of MAH1 sub-cellular localization.** Multiple staining techniques were employed to test the sub-cellular localization of MAH1, as detected by a MAH1:GFP fusion protein in *mah1* mutant background. **A** Rhodamine signal specific for reticulate membrane networks, **B** GFP signal reflecting MAH1 localization, and **C** overlay of both signals. Co-staining with FM 4-64, a dye specific for plasma and vacuolar membranes (Vida and Emr, 1995) was further used to distinguish the MAH1 localization from these other membrane compartments. **D** FM 4-64 signal alone, **E** GFP signal reflecting MAH1 localization, and **F** overlay of both signals. Bars = 10  $\mu\text{m}$ .
