# Supplementary material
Source: PubMed Central journal article supplement (PMC2048791)

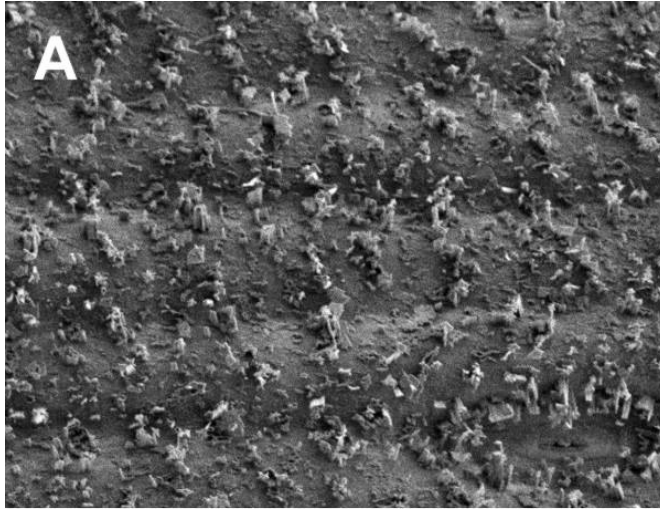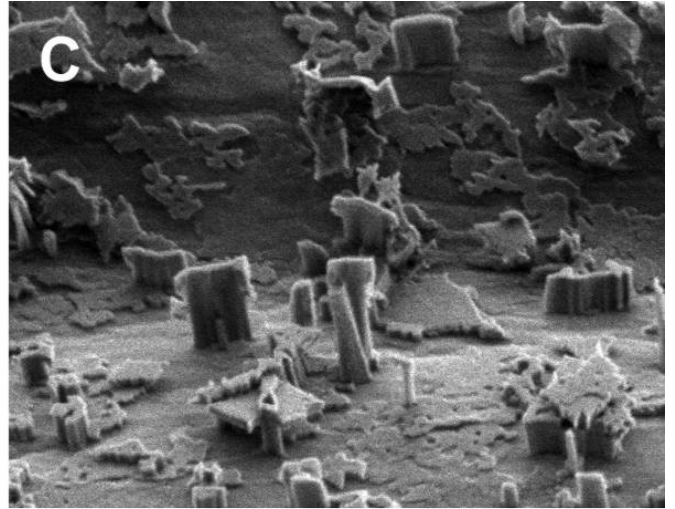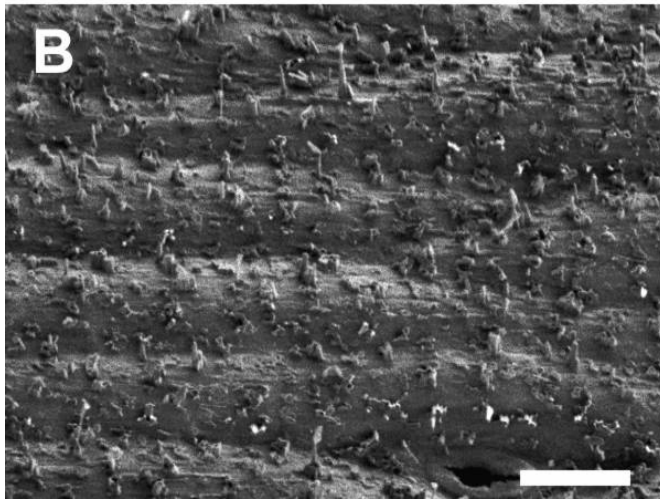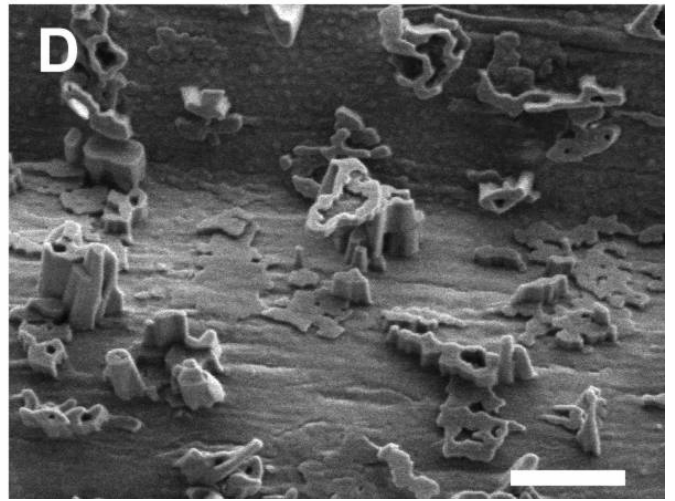

**Supplemental Figure 1**

Supplement: plntphys_pp.107.107300_1.pdf [file plntphys_pp.107.107300_1.pdf]

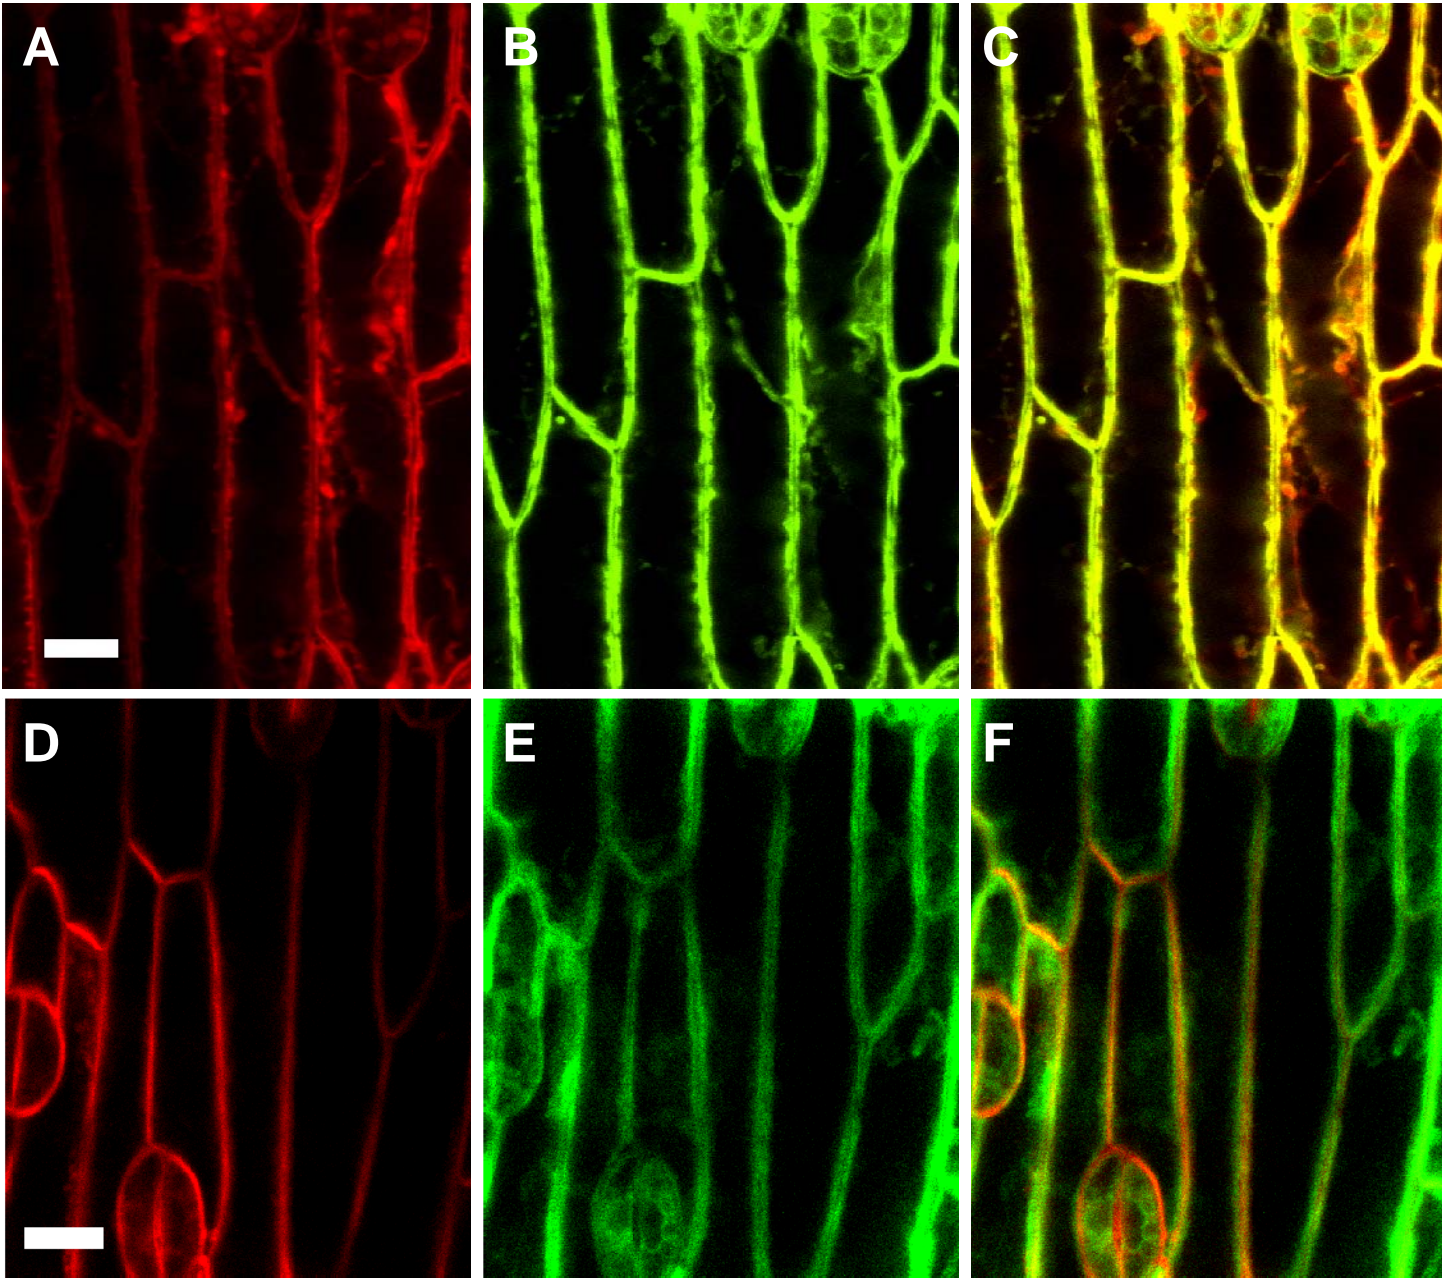

Supplemental Figure 2

Supplement: plntphys_pp.107.107300_2.pdf [file plntphys_pp.107.107300_2.pdf]
